# Supplementary material for: The LDL1/2-HDA6 Histone Modification Complex Interacts With TOC1 and Regulates the Core Circadian Clock Components in Arabidopsis
Source: PubMed Central journal article supplement (PMC6399392; doi:10.3389/fpls.2019.00233), 2019-02-26
Supplement: Table_1.pdf [file Table_1.pdf]

**Table S1: Primers used in this research.**

| NAME      | SEQUENCE                    | NOTE    |
|-----------|-----------------------------|---------|
| CCA1_RT_F | TCTGTGTCTGACGAGGGTCGAATT    | qRT-PCR |
| CCA1_RT_R | ACTTTGCGGCAATACCTCTCTGG     | qRT-PCR |
| LHY_RT_F  | ACGAAACAGGTAAGTGGCGACATT    | qRT-PCR |
| LHY_RT_R  | TGGGAACATCTTGAACCGCGTT      | qRT-PCR |
| TOC1_RT_F | AGCTGCACCTAGCTTCAAGCACT     | qRT-PCR |
| TOC1_RT_R | ATGATGTCGAGGCAAGACGAAGTC    | qRT-PCR |
| UBQ10_F   | TCCAGGACAAGGAGGTATTCCTCCG   | qRT-PCR |
| UBQ10_R   | CCACCAAAGTTTTACATGAAACGAA   | qRT-PCR |
| CCA1_P_F  | GTGTAGTGAACCGCACGAGA        | ChIP    |
| CCA1_P_R  | CCGGGACTACCTGAAAGGTT        | ChIP    |
| CCA1_E_F  | GAGGAGCTTAGTGATGGAGACA      | ChIP    |
| CCA1_E_R  | TTCCTCAGTCCACCTTTCACG       | ChIP    |
| CCA1_U_F  | CTTGTCATAGTCTTCTGTAACAT     | ChIP    |
| CCA1_U_R  | GAGCCCCTTGAGTGAAGTTCT       | ChIP    |
| LHY_P_F   | TTCTGGCTCGTAGAGAAGCAA       | ChIP    |
| LHY_P_R   | GCCAGAAGCAATCTCAGCCAC       | ChIP    |
| LHY_E_F   | TGTTTGGGGAGATCAAAGATGGT     | ChIP    |
| LHY_E_R   | TGTATTAGTATCCATAACAGGACCG   | ChIP    |
| LHY_U_F   | TCTTTGGTCATGTCAGGTTCTGT     | ChIP    |
| LHY_U_R   | GACAAGAGACAAGACATGGGGT      | ChIP    |
| ACT2_F    | CGTTTCGCTTTCCTTAGTGTTAGCT   | ChIP    |
| ACT2_R    | AGCGAACGGATCTAGAGACTCACCTTG | ChIP    |
| TUB2_F    | ACAAACACAGAGAGGAGTGAGCA     | ChIP    |
| TUB2_R    | ACGCATCTTCGGTTGGATGAGTGA    | ChIP    |
